# Supplementary material for: Targeted NGS panel reveals a high burden of collagen IV, podocyte, and transcription factor gene mutations in biopsy-proven focal segmental glomerulosclerosis
Source: Research Square preprint supplement (doi:10.21203/rs.3.rs-8663234/v1), 2026-01-30
Supplement: Supplementary file 1 [file 4808264099d3f2a9d6332dcb.docx]

Supplementary Table S2. Detailed characteristics of pathogenic and likely pathogenic variants identified in collagen type IV, podocyte-associated, and transcription factor genes.

The table presents all LP/P variants detected in the cohort, organized by gene and variant type. Variants are annotated using HGVS nomenclature according to the reference transcripts indicated. ACMG classification was performed using Franklin software. The number of affected patient’s column indicates recurrent variants found in multiple unrelated individuals, with frameshift mutations representing the predominant variant type in COL4A3, COL4A4, and COL4A5 genes.

| Gene | Transcript ID (NM-Number) | Genotype | Coding (cDNA change) | Protein change | variant effect | Franklin ACMG classification | Number of affected patients |
| --- | --- | --- | --- | --- | --- | --- | --- |
| COL4A4 | NM_000092.5 | AG/A | c.1220delC | p.Pro407LeufsTer51 | frameshift | P | 6 |
| COL4A4 | NM_000092.5 | GT/G | c.1302delA | p.Lys434AsnfsTer24 | frameshift | LP | 3 |
| COL4A4 | NM_000092.5 | G/GC | c.2583_2584insG | p.Pro862AlafsTer35 | frameshift | LP | 5 |
| COL4A4 | NM_000092.5 | CT/C | c.2714delA | p.Lys905ArgfsTer45 | frameshift | LP | 4 |
| COL4A4 | NM_000092.5 | T/TC | c.2843_2844insG | p.Leu949ThrfsTer14 | frameshift | LP | 3 |
| COL4A4 | NM_000092.5 | G/GA | c.3138_3139insT | p.Pro1047SerfsTer3 | frameshift | LP | 3 |
| COL4A4 | NM_000092.5 | T/TC | c.3425_3426insG | p.Gln1143ThrfsTer47 | frameshift | LP | 4 |
| COL4A4 | NM_000092.5 | G/GC | c.3594_3595insG | p.Pro1199AlafsTer54 | frameshift | LP | 4 |
| COL4A4 | NM_000092.5 | C/C | c.3933C>G | p.Tyr1311Ter | stop gain | P | 3 |
| COL4A4 | NM_000092.5 | G/GC | c.4101_4102insG | p.Pro1368AlafsTer7 | frameshift | LP | 5 |
| COL4A4 | NM_000092.5 | A/AC | c.4253_4254insG | p.Val1419CysfsTer14 | frameshift | LP | 5 |
| COL4A4 | NM_000092.5 | CT/C | c.903delA | p.Gly302ValfsTer23 | frameshift | LP | 5 |
| COL4A3 | NM_000091.5 | T/TG | c.803_804insG | p.Glu269ArgfsTer18 | frameshift | P | 2 |
| COL4A3 | NM_000091.5 | A/AG | c.778_779insG | p.Glu260GlyfsTer27 | frameshift | P | 3 |
| COL4A3 | NM_000091.5 | C/CT | c.615_616insT | p.Pro206SerfsTer7 | frameshift | LP | 4 |
| COL4A3 | NM_000091.5 | C/CG | c.4955_4956insG | p.Gly1653TrpfsTer44 | frameshift | LP | 3 |
| COL4A3 | NM_000091.5 | AT/A | c.4539delT | p.Phe1513LeufsTer16 | frameshift | LP | 6 |
| COL4A3 | NM_000091.5 | G/T | c.4408G>T | p.Gly1470Trp | missense | LP | 3 |
| COL4A3 | NM_000091.5 | TA/T | c.3801delA | p.Gly1268GlufsTer50 | frameshift | LP | 4 |
| COL4A3 | NM_000091.5 | A/AG | c.2857_2858insG | p.Asp953GlyfsTer16 | frameshift | LP | 4 |
| COL4A3 | NM_000091.5 | T/T | c.2371C>T | p.Arg791Ter | stop gain | P | 1 |
| COL4A3 | NM_000091.5 | GT/G | c.2139delT | p.Pro714GlnfsTer33 | frameshift | LP | 6 |
| COL4A3 | NM_000091.5 | T/TG | c.1689_1690insG | p.Arg564GlufsTer20 | frameshift | LP | 6 |
| COL4A3 | NM_000091.5 | C/CG | c.1671_1672insG | p.Leu558AlafsTer26 | frameshift | P | 7 |
| COL4A3 | NM_000091.5 | A/AG | c.1644_1645insG | p.Gln549AlafsTer7 | frameshift | LP | 4 |
| COL4A3 | NM_000091.5 | G/GC | c.1538_1539insC | p.Gly514ArgfsTer20 | frameshift | LP | 6 |
| COL4A3 | NM_000091.5 | G/GA | c.1530_1531insA | p.Gly511ArgfsTer23 | frameshift | LP | 6 |
| COL4A3 | NM_000091.5 | GAAAAG/GAAAG | c.1058delA | p.Lys353ArgfsTer47 | frameshift | LP | 5 |
| COL4A3 | NM_000091.5 | A/A | c.1039delT | p.Tyr347MetfsTer53 | frameshift | LP | 5 |
| COL4A5 | NM_033380.3 | CAAAA/CAAA | c.2394delA | p.Gly799ValfsTer20 | frameshift | LP | 3 |
| COL4A5 | NM_033380.3 | A/AG | c.2539_2540insG | p.Asp847GlyfsTer8 | frameshift | LP | 2 |
| COL4A5 | NM_033380.3 | GT/G | c.3102delT | p.Pro1035GlnfsTer117 | frameshift | LP | 2 |
| COL4A5 | NM_033380.3 | A/AG | c.4063_4064insG | p.Glu1355GlyfsTer24 | frameshift | LP | 3 |
| COL4A5 | NM_033380.3 | A/AAG | c.650_651insGA | p.Asn217LysfsTer5 | frameshift | LP | 2 |
| COL4A5 | NM_033380.3 | GAAAAT/GAAAT | c.917delA | p.Asn306MetfsTer40 | frameshift | P | 3 |
| COL4A5 | NM_033380.3 | GA/G | c.687delA | p.Gly230ValfsTer24 | frameshift | P | 4 |
| JAG1 | NM_000214.3 | ATT/ATTT | c.1003_1004insA | p.Ile335AsnfsTer3 | frameshift | LP | 4 |
| JAG1 | NM_000214.3 | T/TG | c.1091_1092insC | p.Gly365ArgfsTer12 | missense | LP | 7 |
| JAG1 | NM_000214.3 | T/TG | c.1615_1616insC | p.Gln539ProfsTer8 | frameshift | LP | 5 |
| JAG1 | NM_000214.3 | C/CG | c.1656_1657insC | p.Glu553ArgfsTer4 | frameshift | LP | 5 |
| JAG1 | NM_000214.3 | AG/A | c.1713delC | p.Cys572ValfsTer3 | Missense | P | 8 |
| JAG1 | NM_000214.3 | G/GC | c.2270_2271insG | p.Thr758HisfsTer28 | frameshift | P | 2 |
| JAG1 | NM_000214.3 | G/C | c.2429C>G | p.Pro810Arg | Missense | LP | 7 |
| JAG1 | NM_000214.3 | AACC/AC | c.2432_2433delGT | p.Gly811ValfsTer12 | frameshift | LP | 5 |
| JAG1 | NM_000214.3 | CAAAAC/CAAAC | c.2436delT | p.Phe812LeufsTer8 | frameshift | LP | 7 |
| JAG1 | NM_000214.3 | AT/A | c.2625delA | p.Lys875AsnfsTer12 | frameshift | P | 6 |
| JAG1 | NM_000214.3 | G/GT | c.3123_3124insA | p.Arg1042ThrfsTer2 | frameshift | LP | 7 |
| JAG1 | NM_000214.3 | GT/G | c.3341delA | p.Asn1114ThrfsTer6 | frameshift | LP | 8 |
| JAG1 | NM_000214.3 | GT/G | c.3371delA | p.Asn1124ThrfsTer26 | frameshift | LP | 7 |
| JAG1 | NM_000214.3 | A/AG | c.950_951insC | p.Asp318Ter | frameshift | LP | 5 |
| JAG1 | NM_000214.3 | A/AC | c.981_982insG | p.Tyr328ValfsTer7 | frameshift | LP | 10 |
| TRPC6 | NM_004621.6 | GA/G | c.1359delT | p.Leu454TrpfsTer4 | frameshift | LP | 13 |
| TRPC6 | NM_004621.6 | CA/C | c.1691delT | p.Leu564Ter | frameshift | LP | 2 |
| TRPC6 | NM_004621.6 | TA/T | c.1841delT | p.Leu614TyrfsTer36 | frameshift | LP | 6 |
| TRPC6 | NM_004621.6 | C/CA | c.1935_1936insT | p.Val646CysfsTer21 | frameshift | LP | 6 |
| TRPC6 | NM_004621.6 | CT/C | c.2379delA | p.Gly794ValfsTer8 | frameshift | LP | 8 |
| TRPC6 | NM_004621.6 | AT/A | c.2572delA | p.Ile858Ter | frameshift | LP | 4 |
| TRPC6 | NM_004621.6 | CA/C | c.308delT | p.Leu103TrpfsTer16 | frameshift | LP | 5 |
| TRPC6 | NM_004621.6 | G/GT | c.783_784insA | p.Gln262ThrfsTer4 | frameshift | LP | 5 |
| TRPC6 | NM_004621.6 | T/TA | c.801_802insT | p.Ser268Ter | frameshift | LP | 3 |
| TRPC6 | NM_004621.6 | CA/C | c.984delT | p.Phe328LeufsTer19 | frameshift | LP | 6 |
